# Supplementary material
Source: PubMed Central journal article supplement (PMC3911534)
Supplement: JVI.03245-13_zjv999098653so1.pdf [file JVI.03245-13_zjv999098653so1.pdf]

## Supplementary movie legends

Movie 1. A time-lapse movie (one frame every 2 mins) showing an HIV-1<sub>NL-Gag-JRFL</sub>-infected MDM transferring virus from a VCC-like compartment to a contacting autologous CD4<sup>+</sup> T cell starting at 30 mins.

Movie 2. A time-lapse movie (one frame every 5 mins) showing an HIV-1<sub>NL-Gag-JRFL</sub>-infected MDM transferring virus from dispersed VCC-like compartments to a contacting autologous CD4<sup>+</sup> T cell with T cell detaching at T = 76.02 mins.

**Supplementary Table 1. Statistical comparison of inhibitor IC<sub>50</sub> values for BaL Env via cell-free and cell-to-cell routes**

| Inhibitor | CTC<br>LogIC <sub>50</sub> (SE) | CF<br>LogIC <sub>50</sub> (SE) | F-test P value |
|-----------|---------------------------------|--------------------------------|----------------|
| VRC01     | -1.391 (0.16)                   | -1.475 (0.06)                  | 0.634          |
| b12       | 0.164 (0.27)                    | -1.057 (0.09)                  | 0.002          |
| PGT121    | -2.073 (0.16)                   | -2.422 (0.08)                  | 0.138          |
| 2G12      | -0.124 (0.23)                   | -0.350 (0.43)                  | 0.776          |
| 2F5       | -                               | -0.330 (0.26)                  | -              |
| 4E10      | -                               | -1.147 (0.32)                  | -              |
| 10E8      | 1.258 (0.36)                    | -0.578 (0.03)                  | < 0.001        |
| 10E8 Fab  | 0.491 (0.15)                    | -0.660 (0.34)                  | 0.013          |
| T-20      | -1.643 (0.19)                   | -2.910 (0.10)                  | 0.001          |

**Supplementary Table 2. Statistical comparison of IC<sub>50</sub> values for YU2 Env via cell-free and cell-to-cell routes**

| Inhibitor | CTC<br>LogIC <sub>50</sub> (SE) | CF<br>LogIC <sub>50</sub> (SE) | F-test P |
|-----------|---------------------------------|--------------------------------|----------|
| VRC01     | -1.099 (0.18)                   | -0.910 (0.09)                  | 0.387    |
| b12       | 0.363 (0.64)                    | -0.066 (0.50)                  | 0.612    |
| PGT121    | -1.630 (0.19)                   | -1.570 (0.10)                  | 0.798    |
| 2F5       | -                               | -0.941 (0.26)                  | -        |
| 10E8      | -                               | -1.354 (0.13)                  | -        |
| 10E8 Fab  | -0.403 (0.23)                   | -0.108 (0.24)                  | 0.396    |
| T-20      | -1.763 (0.30)                   | -1.094 (0.30)                  | 0.154    |
